# Supplementary material for: Commercial vaccines used in poultry, cattle, and aquaculture: a multidirectional comparison
Source: Frontiers journal article supplement (doi:10.3389/fvets.2023.1307585), 2024-01-03
Supplement: Table_1.XLS [file Table_1.XLS]

## Sheet: Hoja3
Species	Technology	Vaccine type	Pathogen	Formulation	Adjuvant	Intramuscular	Subcutaneous	Intraperitoneal	Oral	Oculo-nasal	Intranasal	Wing piercing	Inmersion	In Ovo		Code	Species
1	1	1	3	2	3	2	2	1	2	2	2	2	2	2		1	Fish
1	1	1	1	2	3	2	2	1	2	2	2	2	2	2		2	Cattle
1	1	2	1	1	7	2	2	1	2	2	2	2	2	2		3	Poultry
1	2	3	2	1	7	1	2	2	2	2	2	2	2	2
3	1	2	2	1	7	2	2	2	1	1	2	2	2	2		Code	Technology
3	1	2	2	1	7	2	2	2	1	1	2	2	2	2		1	Traditional
2	1	2	2	2	7	1	1	2	2	2	2	2	2	2		2	Modern
1	1	1	1	1	3	2	2	1	2	2	2	2	2	2
1	1	1	1	1	3	2	2	1	2	2	2	2	2	2		Code	Vaccine type
1	1	1	1	1	3	2	2	1	2	2	2	2	2	2		1	Inactive
1	1	1	1	1	3	2	2	1	2	2	2	2	2	2		2	Live
2	1	2	1	1	5	2	1	2	2	2	2	2	2	2		3	Recombinant/Subunit/DNA
2	1	2	1	1	5	2	1	2	2	2	2	2	2	2		4	Virus deleted
3	1	1	2	2	4	1	1	2	2	2	2	2	2	2
3	1	1	2	2	4	1	1	2	2	2	2	2	2	2		Code	Pathogen type
3	1	1	1	2	4	1	1	2	2	2	2	2	2	2		1	Bacteria
3	1	1	1	1	4	2	1	2	2	2	2	2	2	2		2	Virus
3	1	1	2	1	4	2	1	2	2	2	2	2	2	2		3	Mixed (virus + bacteria)
3	1	1	2	1	4	1	1	2	2	2	2	2	2	2		4	Parasites
3	1	1	1	2	4	2	1	2	2	2	2	2	2	2
3	1	2	2	1	2	2	2	2	1	1	1	2	2	2		Code	Formulation
3	1	2	2	1	2	2	2	2	1	2	2	2	2	2		1	Monovalent
3	1	2	2	1	2	2	2	2	2	1	1	2	2	2		2	Polyvalent
3	1	2	2	1	2	2	2	2	1	1	1	2	2	2
3	1	2	2	2	2	2	2	2	2	1	1	2	2	2		Code	Adjuvant
3	1	2	2	2	2	2	2	2	1	2	2	2	2	2		1	Aluminum compounds
3	1	2	2	2	2	2	2	2	1	1	1	2	2	2		2	Saponin
3	1	2	2	2	2	2	2	2	1	1	1	2	2	2		3	Aceite mineral
3	1	2	2	1	2	2	2	2	1	2	2	2	2	2		4	Other oily substances
3	1	2	2	1	2	2	2	2	1	2	2	2	2	2		5	Combinations
3	1	2	2	1	2	2	1	2	2	2	2	2	2	1		6	Polimers
3	1	2	2	1	2	2	1	2	2	2	2	2	2	2		7	Sin adyuvante
3	1	2	2	1	2	2	2	2	2	1	1	2	2	2
3	1	2	1	1	2	2	2	2	2	1	2	2	2	2
3	1	2	2	1	2	2	2	2	2	2	2	1	2	2		Code	Route of administration
3	1	2	2	1	2	2	2	2	2	1	1	2	2	2		1	Intramuscular YES
3	1	2	2	1	2	2	2	2	1	2	2	2	2	2		2	Intramuscular NO
3	1	2	2	1	2	2	1	2	2	2	2	2	2	1
3	1	2	2	2	2	2	1	2	2	2	2	2	2	1		Code	Route of administration
3	1	2	4	2	2	2	2	2	2	1	2	2	2	2		1	Subcutaneous YES
3	1	2	4	2	2	2	2	2	2	1	1	2	2	2		2	Subcutaneous NO
3	1	1	2	1	4	1	1	2	2	2	2	2	2	2
3	1	1	2	2	4	1	1	2	2	2	2	2	2	2		Code	Route of administration
3	1	1	2	1	4	1	2	2	2	2	2	2	2	2		1	Intraperitoneal YES
3	1	1	2	1	4	1	1	2	2	2	2	2	2	2		2	Intraperitoneal NO
3	1	1	2	2	4	1	1	2	2	2	2	2	2	2
3	1	1	2	2	4	1	1	2	2	2	2	2	2	2		Code	Route of administration
3	1	1	2	2	4	1	1	2	2	2	2	2	2	2		1	Oral YES
1	1	1	1	2	3	2	2	1	2	2	2	2	2	2		2	Oral NO
3	1	2	2	2	7	2	2	2	1	1	1	2	2	2
3	1	2	2	2	7	2	2	2	1	1	1	2	2	2		Code	Route of administration
3	1	2	2	2	7	2	2	2	1	1	1	2	2	2		1	Oculo-nasal YES
3	1	2	2	1	7	2	2	2	1	1	1	2	2	2		2	Oculo-nasal NO
3	1	1	2	2	3	1	1	2	2	2	2	2	2	2
2	1	1	1	2	1	2	1	2	2	2	2	2	2	2		Code	Route of administration
1	1	1	1	1	3	2	2	1	2	2	2	2	2	2		1	Intranasal YES
1	1	1	1	1	3	2	2	1	2	2	2	2	2	2		2	Intranasal NO
1	1	1	2	2	3	2	2	1	2	2	2	2	2	2
1	1	1	3	2	3	2	2	1	2	2	2	2	2	2		Code	Route of administration
1	1	1	1	1	6	2	2	2	2	2	2	2	1	2		1	Wing piercing YES
1	1	1	1	1	6	2	2	2	2	2	2	2	1	2		2	Wing piercingr NO
1	1	1	1	1	6	2	2	2	2	2	2	2	1	2
1	1	1	1	1	6	2	2	2	2	2	2	2	1	2		Code	Route of administration
1	1	1	1	1	4	2	2	2	2	2	2	2	1	2		1	Inmersion YES
1	1	1	1	1	4	2	2	2	2	2	2	2	1	2		2	Inmersion NO
1	1	1	1	1	4	2	2	2	2	2	2	2	1	2
1	1	1	2	1	4	2	2	2	2	2	2	2	1	2		Code	Route of administration
1	1	1	1	1	4	2	2	1	2	2	2	2	2	2		1	In Ovo YES
1	1	1	1	1	5	2	2	1	2	2	2	2	2	2		2	In Ovo NO
1	1	1	1	1	5	2	2	1	2	2	2	2	2	2
1	1	1	1	1	4	2	2	1	2	2	2	2	2	2
1	1	1	1	1	4	2	2	1	2	2	2	2	2	2
1	1	1	1	1	4	2	2	1	2	2	2	2	2	2
1	1	1	2	1	4	2	2	1	2	2	2	2	2	2
1	1	1	1	1	4	2	2	1	2	2	2	2	2	2
1	1	1	1	1	4	2	2	1	2	2	2	2	2	2
1	1	1	1	1	4	2	2	1	2	2	2	2	1	2
1	1	1	1	1	4	2	2	1	2	2	2	2	2	2
1	1	1	1	1	4	2	2	1	2	2	2	2	2	2
1	1	1	1	1	4	2	2	1	2	2	2	2	2	2
1	1	1	1	1	4	2	2	1	2	2	2	2	2	2
1	1	1	1	1	4	2	2	1	2	2	2	2	2	2
1	1	1	1	1	4	2	2	1	2	2	2	2	2	2
1	1	1	1	1	4	2	2	1	2	2	2	2	2	2
1	1	1	1	1	4	2	2	1	2	2	2	2	2	2
1	1	1	1	1	4	2	2	1	2	2	2	2	2	2
1	1	1	1	1	4	2	2	1	2	2	2	2	2	2
1	1	1	1	1	4	2	2	1	2	2	2	2	2	2
1	1	1	1	2	4	2	2	1	2	2	2	2	2	2
1	1	1	1	2	4	2	2	1	2	2	2	2	2	2
1	1	1	1	2	4	2	2	1	2	2	2	2	2	2
1	1	1	1	2	4	2	2	1	2	2	2	2	2	2
1	1	1	1	2	4	2	2	1	2	2	2	2	2	2
1	1	1	1	2	4	2	2	1	2	2	2	2	2	2
1	1	1	1	2	4	2	2	1	2	2	2	2	2	2
1	1	1	1	2	4	2	2	1	2	2	2	2	2	2
1	1	1	1	2	4	2	2	1	2	2	2	2	2	2
1	1	1	1	2	4	2	2	1	2	2	2	2	2	2
1	1	1	1	2	4	2	2	1	2	2	2	2	2	2
1	1	1	1	2	4	2	2	1	2	2	2	2	2	2
1	1	1	1	2	3	2	2	1	2	2	2	2	2	2
1	1	1	1	2	3	2	2	1	2	2	2	2	2	2
1	1	1	1	2	3	2	2	1	2	2	2	2	2	2
1	1	1	1	2	3	2	2	1	2	2	2	2	2	2
1	1	1	1	2	3	2	2	1	2	2	2	2	2	2
1	1	1	1	2	3	2	2	1	2	2	2	2	2	2
1	1	1	1	2	3	2	2	1	2	2	2	2	2	2
1	1	1	1	2	3	2	2	1	2	2	2	2	2	2
1	1	1	1	2	3	2	2	1	2	2	2	2	2	2
1	1	1	1	2	3	2	2	1	2	2	2	2	2	2
1	1	1	1	2	3	2	2	1	2	2	2	2	2	2
1	1	1	1	2	3	2	2	1	2	2	2	2	2	2
1	1	1	2	2	3	2	2	1	2	2	2	2	2	2
1	1	1	2	2	3	2	2	1	2	2	2	2	2	2
1	1	1	2	2	3	2	2	1	2	2	2	2	2	2
1	1	1	2	2	3	2	2	1	2	2	2	2	2	2
1	1	1	2	2	3	2	2	1	2	2	2	2	2	2
1	1	1	2	2	3	2	2	1	2	2	2	2	2	2
1	1	1	2	2	3	2	2	1	2	2	2	2	2	2
1	1	1	2	2	3	2	2	1	2	2	2	2	2	2
1	1	1	2	2	3	2	2	1	2	2	2	2	2	2
1	1	1	3	2	3	2	2	1	2	2	2	2	2	2
1	1	1	3	2	3	2	2	1	2	2	2	2	2	2
1	1	1	3	2	3	2	2	1	2	2	2	2	2	2
1	1	1	3	2	3	2	2	1	2	2	2	2	2	2
1	1	1	3	2	5	2	2	1	2	2	2	2	2	2
1	1	1	3	2	5	2	2	1	2	2	2	2	2	2
1	1	1	3	2	5	2	2	2	1	2	2	2	2	2
1	1	1	3	2	5	2	2	2	1	2	2	2	2	2
1	1	1	3	2	5	2	2	2	1	2	2	2	2	2
1	1	1	3	2	5	2	2	2	2	2	2	2	1	2
1	1	1	3	2	4	2	2	2	2	2	2	2	1	2
1	2	3	2	1	7	2	2	2	1	2	2	2	2	2
1	1	1	3	2	3	2	2	2	2	2	2	2	1	2
1	1	1	3	2	3	2	2	2	2	2	2	2	1	2
1	1	1	3	2	3	2	2	2	2	2	2	2	1	2
1	1	1	3	2	3	2	2	2	2	2	2	2	1	2
1	1	1	3	2	3	2	2	2	2	2	2	2	1	2
1	1	2	3	2	7	2	2	2	2	2	2	2	1	2
1	1	2	3	2	7	2	2	2	2	2	2	2	1	2
1	1	2	3	2	7	2	2	2	2	2	2	2	1	2
1	2	3	3	2	3	2	2	1	2	2	2	2	2	2
1	2	3	3	2	4	2	2	1	2	2	2	2	2	2
1	2	3	4	1	3	2	2	1	2	2	2	2	2	2
2	1	1	1	2	1	1	1	2	2	2	2	2	2	2
2	1	1	1	2	3	1	1	2	2	2	2	2	2	2
2	1	1	1	1	3	1	1	2	2	2	2	2	2	2
2	1	1	1	1	3	1	1	2	2	2	2	2	2	2
2	1	2	2	1	5	1	1	2	2	2	2	2	2	2
2	2	3	1	1	4	1	2	2	2	2	2	2	2	2
2	1	1	1	1	1	1	1	2	2	2	2	2	2	2
2	1	1	1	1	1	1	1	2	2	2	2	2	2	2
2	1	1	1	1	1	1	1	2	2	2	2	2	2	2
2	1	1	1	1	1	1	1	2	2	2	2	2	2	2
2	1	1	1	1	1	1	1	2	2	2	2	2	2	2
2	1	1	1	1	1	1	1	2	2	2	2	2	2	2
2	1	1	1	1	1	1	1	2	2	2	2	2	2	2
2	1	1	1	1	1	1	1	2	2	2	2	2	2	2
2	1	1	1	1	1	1	1	2	2	2	2	2	2	2
2	1	1	1	2	1	1	1	2	2	2	2	2	2	2
2	1	1	1	2	1	1	1	2	2	2	2	2	2	2
2	1	1	1	2	1	1	1	2	2	2	2	2	2	2
2	1	1	1	2	1	1	1	2	2	2	2	2	2	2
2	1	1	1	2	1	1	1	2	2	2	2	2	2	2
2	1	1	1	2	1	1	1	2	2	2	2	2	2	2
2	1	1	1	2	1	1	1	2	2	2	2	2	2	2
2	1	1	1	2	1	1	1	2	2	2	2	2	2	2
2	1	1	1	2	1	1	1	2	2	2	2	2	2	2
2	1	1	1	2	1	1	1	2	2	2	2	2	2	2
2	1	1	1	2	1	1	1	2	2	2	2	2	2	2
2	1	1	1	2	1	1	1	2	2	2	2	2	2	2
2	1	1	1	2	1	1	1	2	2	2	2	2	2	2
2	1	1	1	2	1	1	1	2	2	2	2	2	2	2
2	1	1	1	2	2	1	1	2	2	2	2	2	2	2
2	1	1	1	2	2	1	1	2	2	2	2	2	2	2
2	1	1	1	2	2	1	1	2	2	2	2	2	2	2
2	1	1	1	2	2	1	1	2	2	2	2	2	2	2
2	1	1	1	2	2	1	1	2	2	2	2	2	2	2
2	1	1	1	2	3	1	1	2	2	2	2	2	2	2
2	1	1	1	2	3	1	1	2	2	2	2	2	2	2
2	1	1	1	2	3	1	1	2	2	2	2	2	2	2
2	1	1	1	2	3	1	1	2	2	2	2	2	2	2
2	1	1	1	2	4	1	1	2	2	2	2	2	2	2
2	1	1	1	2	4	1	1	2	2	2	2	2	2	2
2	1	1	1	2	4	1	1	2	2	2	2	2	2	2
2	1	1	1	2	5	1	1	2	2	2	2	2	2	2
2	1	1	1	2	5	1	1	2	2	2	2	2	2	2
2	1	1	1	2	5	1	1	2	2	2	2	2	2	2
2	1	1	1	2	5	1	1	2	2	2	2	2	2	2
2	1	1	2	2	5	1	1	2	2	2	2	2	2	2
2	1	1	2	2	5	1	1	2	2	2	2	2	2	2
2	1	1	2	2	5	1	1	2	2	2	2	2	2	2
2	1	1	2	2	5	1	1	2	2	2	2	2	2	2
2	1	1	2	2	5	1	1	2	2	2	2	2	2	2
2	1	1	2	2	5	1	1	2	2	2	2	2	2	2
2	1	1	2	2	5	1	1	2	2	2	2	2	2	2
2	1	1	2	2	5	1	1	2	2	2	2	2	2	2
2	1	1	2	2	5	1	1	2	2	2	2	2	2	2
2	1	1	2	2	5	1	1	2	2	2	2	2	2	2
2	1	1	2	2	5	1	1	2	2	2	2	2	2	2
2	1	1	2	2	5	1	1	2	2	2	2	2	2	2
2	1	1	2	2	5	1	1	2	2	2	2	2	2	2
2	1	1	2	2	5	1	1	2	2	2	2	2	2	2
2	1	1	2	2	5	1	1	2	2	2	2	2	2	2
2	1	1	2	2	5	1	1	2	2	2	2	2	2	2
2	1	1	2	2	5	2	1	2	2	2	2	2	2	2
2	1	1	2	2	5	2	1	2	2	2	2	2	2	2
2	1	1	2	2	5	2	1	2	2	2	2	2	2	2
2	1	1	2	2	5	2	1	2	2	2	2	2	2	2
2	1	1	2	2	5	2	1	2	2	2	2	2	2	2
2	1	1	2	2	5	2	1	2	2	2	2	2	2	2
2	1	1	2	2	5	2	1	2	2	2	2	2	2	2
2	1	1	2	2	5	2	1	2	2	2	2	2	2	2
2	1	1	2	2	5	2	1	2	2	2	2	2	2	2
2	1	1	2	2	5	2	1	2	2	2	2	2	2	2
2	1	1	2	2	5	2	1	2	2	2	2	2	2	2
2	1	1	2	2	5	2	1	2	2	2	2	2	2	2
2	1	1	2	2	5	2	1	2	2	2	2	2	2	2
2	1	2	2	2	5	2	1	2	2	2	2	2	2	2
2	1	2	2	2	5	2	2	2	2	2	1	2	2	2
2	1	2	2	2	5	2	2	2	2	2	1	2	2	2
2	1	2	2	2	5	2	2	2	2	2	1	2	2	2
2	1	2	2	2	5	2	2	2	2	2	1	2	2	2
2	1	2	2	2	5	2	2	2	2	2	1	2	2	2
2	1	2	2	2	5	2	2	2	2	2	1	2	2	2
2	1	2	3	2	5	2	2	2	2	2	2	2	2	2
2	1	2	3	2	5	2	2	2	2	2	2	2	2	2
2	1	2	3	2	7	2	2	2	2	2	2	2	2	2
2	1	2	3	2	7	2	2	2	2	2	2	2	2	2
2	1	2	3	2	7	2	2	2	2	2	2	2	2	2
2	1	2	3	2	7	2	2	2	2	2	2	2	2	2
2	1	2	3	2	7	2	2	2	2	2	2	2	2	2
2	1	2	3	2	7	2	2	2	2	2	2	2	2	2
2	1	2	3	2	7	2	2	2	2	2	2	2	2	2
2	1	2	3	2	7	2	2	2	2	2	2	2	2	2
2	1	2	3	2	7	2	2	2	2	2	2	2	2	2
2	1	2	3	2	7	2	2	2	2	2	2	2	2	2
2	1	2	3	2	7	2	2	2	2	2	2	2	2	2
2	1	2	3	2	7	2	2	2	2	2	2	2	2	2
2	1	2	3	2	7	2	2	2	2	2	2	2	2	2
2	1	2	3	2	7	2	2	2	2	2	2	2	2	2
2	1	2	3	2	7	2	2	2	2	2	2	2	2	2
2	1	2	3	2	7	2	2	2	2	2	2	2	2	2
2	1	2	3	2	7	2	2	2	2	2	2	2	2	2
2	1	2	3	2	7	2	2	2	2	2	2	2	2	2
2	1	2	3	2	7	2	2	2	2	2	2	2	2	2
2	1	2	3	2	7	2	2	2	2	2	2	2	2	2
2	1	2	3	2	7	2	2	2	2	2	2	2	2	2
2	1	2	3	2	7	2	2	2	2	2	2	2	2	2
2	1	2	3	2	7	2	2	2	2	2	2	2	2	2
2	1	2	3	2	7	2	2	2	2	2	2	2	2	2
2	1	2	3	2	7	2	2	2	2	2	2	2	2	2
2	1	2	3	2	7	2	2	2	2	2	2	2	2	2
2	1	2	3	2	7	2	2	2	2	2	2	2	2	2
2	1	2	3	2	7	2	2	2	2	2	2	2	2	2
2	1	2	3	2	7	2	2	2	2	2	2	2	2	2
2	1	2	3	2	7	2	2	2	2	2	2	2	2	2
2	1	2	3	2	7	2	2	2	2	2	2	2	2	2
2	1	2	3	2	7	2	2	2	2	2	2	2	2	2
2	1	2	3	2	7	2	2	2	2	2	2	2	2	2
2	1	2	3	2	7	2	2	2	2	2	2	2	2	2
2	1	2	3	2	7	2	2	2	2	2	2	2	2	2
2	2	3	4	1	5	1	1	2	2	2	2	2	2	2
2	2	4	2	1	7	1	2	2	2	2	1	2	2	2
2	2	4	2	1	1	1	2	2	2	2	2	2	2	2
2	2	4	2	1	7	1	2	2	2	2	2	2	2	2
3	1	1	1	1	1	1	1	2	1	1	2	2	2	2
3	1	1	1	1	1	1	1	2	1	1	2	2	2	2
3	1	1	1	1	3	1	1	2	1	1	2	2	2	2
3	1	1	1	1	3	1	1	2	1	1	2	2	2	2
3	1	1	1	1	3	1	1	2	1	1	2	2	2	2
3	1	1	1	1	3	1	1	2	1	1	2	2	2	2
3	1	1	1	1	3	1	1	2	1	1	2	2	2	2
3	1	1	1	1	3	1	1	2	1	1	2	2	2	2
3	1	1	1	1	3	1	1	2	1	1	2	2	2	2
3	1	1	1	1	3	1	1	2	1	1	2	2	2	2
3	1	1	1	1	3	1	1	2	1	1	2	2	2	2
3	1	1	1	1	4	1	1	2	1	1	2	2	2	2
3	1	1	1	1	4	1	1	2	1	1	2	2	2	2
3	1	1	1	1	4	1	1	2	1	1	2	2	2	2
3	1	1	1	1	4	1	1	2	1	1	2	2	2	2
3	1	1	1	1	4	1	1	2	1	1	2	2	2	2
3	1	1	1	1	4	1	1	2	1	1	2	2	2	2
3	1	1	1	1	4	1	1	2	1	1	2	2	2	2
3	1	1	1	1	4	1	1	2	1	1	2	2	2	2
3	1	1	1	1	4	1	1	2	1	1	2	2	2	2
3	1	1	1	1	4	1	1	2	1	1	2	2	2	2
3	1	1	1	1	4	2	1	2	1	1	2	2	2	2
3	1	1	1	1	4	2	1	2	1	1	2	2	2	2
3	1	1	1	1	4	2	1	2	1	1	2	2	2	2
3	1	1	2	1	4	2	1	2	1	1	2	2	2	2
3	1	1	2	1	4	2	1	2	1	1	2	2	2	2
3	1	1	2	1	4	2	1	2	1	2	2	2	2	2
3	1	1	2	1	4	2	1	2	1	2	2	2	2	2
3	1	1	2	1	4	2	1	2	1	2	2	2	2	2
3	1	1	2	1	5	2	1	2	1	2	2	2	2	2
3	1	2	2	1	5	2	1	2	1	2	2	2	2	2
3	1	2	2	1	7	2	1	2	1	2	2	2	2	2
3	1	2	2	1	7	2	1	2	1	2	2	2	2	2
3	1	2	2	1	7	2	1	2	1	2	2	2	2	2
3	1	2	2	1	7	2	1	2	1	2	2	2	2	2
3	1	2	2	2	7	2	1	2	1	2	2	2	2	2
3	1	2	2	2	7	2	1	2	1	2	2	2	2	2
3	1	2	2	2	7	2	1	2	1	2	2	2	2	2
3	1	2	2	2	7	2	2	2	1	2	2	2	2	2
3	1	2	2	2	7	2	2	2	1	2	2	2	2	2
3	1	2	2	2	7	2	2	2	2	2	2	2	2	2
3	1	2	2	2	7	2	2	2	2	2	2	2	2	2
3	1	2	2	2	7	2	2	2	2	2	2	2	2	2
3	1	2	2	2	7	2	2	2	2	2	2	2	2	2
3	1	2	2	2	7	2	2	2	2	2	2	2	2	2
3	1	2	2	2	7	2	2	2	2	2	2	2	2	2
3	1	2	2	2	7	2	2	2	2	2	2	2	2	2
3	1	2	2	2	7	2	2	2	2	2	2	2	2	2
3	1	2	2	2	7	2	2	2	2	2	2	2	2	2
3	1	2	2	2	7	2	2	2	2	2	2	2	2	2
3	1	2	2	2	7	2	2	2	2	2	2	2	2	2
3	1	2	2	2	7	2	2	2	2	2	2	2	2	2
3	1	2	2	2	7	2	2	2	2	2	2	2	2	2
3	1	2	2	2	7	2	2	2	2	2	2	2	2	2
3	1	2	2	2	7	2	2	2	2	2	2	2	2	2
3	1	2	2	2	7	2	2	2	2	2	2	2	2	2
3	1	2	2	2	7	2	2	2	2	2	2	2	2	2
3	1	2	2	2	7	2	2	2	2	2	2	2	2	2
3	1	2	2	2	7	2	2	2	2	2	2	2	2	2
3	1	2	2	2	7	2	2	2	2	2	2	2	2	2
3	1	2	2	2	7	2	2	2	2	2	2	2	2	2
3	1	2	2	2	7	2	2	2	2	2	2	2	2	2
3	1	2	2	2	7	2	2	2	2	2	2	2	2	2
3	1	2	2	2	7	2	2	2	2	2	2	2	2	2
3	1	2	2	2	7	2	2	2	2	2	2	2	2	2
3	1	2	2	2	7	2	2	2	2	2	2	2	2	2
3	1	2	2	2	7	2	2	2	2	2	2	2	2	2
3	1	2	2	2	7	2	2	2	2	2	2	2	2	2
3	1	2	2	2	7	2	2	2	2	2	2	2	2	2
3	1	2	2	2	7	2	2	2	2	2	2	2	2	2
3	1	2	2	2	7	2	2	2	2	2	2	2	2	2
3	1	2	2	2	7	2	2	2	2	2	2	2	2	2
3	1	2	2	2	7	2	2	2	2	2	2	2	2	2
3	1	2	2	2	7	2	2	2	2	2	2	2	2	2
3	1	2	2	2	7	2	2	2	2	2	2	2	2	2
3	1	2	2	2	7	2	2	2	2	2	2	2	2	2
3	1	2	2	2	7	2	2	2	2	2	2	2	2	2
3	1	2	3	2	7	2	2	2	2	2	2	2	2	2
3	1	2	3	2	7	2	2	2	2	2	2	2	2	2
3	1	2	3	2	7	2	2	2	2	2	2	2	2	2
3	1	2	3	2	7	2	2	2	2	2	2	2	2	2
3	1	2	3	2	7	2	2	2	2	2	2	2	2	2
3	1	2	3	2	7	2	2	2	2	2	2	2	2	2
3	1	2	3	2	7	2	2	2	2	2	2	2	2	2
3	1	2	3	2	7	2	2	2	2	2	2	2	2	2
3	1	2	3	2	7	2	2	2	2	2	2	2	2	2
3	1	2	3	2	7	2	2	2	2	2	2	2	2	2
3	1	2	3	2	7	2	2	2	2	2	2	2	2	2
3	1	2	3	2	7	2	2	2	2	2	2	2	2	2
3	1	2	3	2	7	2	2	2	2	2	2	2	2	2
3	1	2	3	2	7	2	2	2	2	2	2	2	2	2
3	1	2	3	2	7	2	2	2	2	2	2	2	2	2
3	1	2	3	2	7	2	2	2	2	2	2	2	2	2
3	2	4	2	1	7	2	2	2	1	1	2	2	2	2
3	1	2	4	2	7	2	2	2	1	2	2	2	2	2
3	1	2	4	2	7	2	2	2	1	2	2	2	2	2
3	1	2	2	2	7	2	2	2	2	2	2	2	2	2
3	1	2	2	2	7	2	2	2	2	2	2	2	2	2
3	1	2	2	2	7	2	2	2	2	2	2	1	2	2
3	1	2	4	2	7	2	2	2	2	1	2	1	2	2
3	1	2	4	2	7	2	2	2	2	1	2	1	2	2
3	1	2	4	2	7	2	2	2	2	1	2	1	2	2
3	1	1	1	2	1	2	2	2	2	1	2	1	2	2
3	1	1	1	2	1	1	1	2	1	1	2	1	2	2
3	1	1	2	2	3	1	1	2	1	1	2	2	2	2
3	1	1	2	2	3	1	1	2	1	1	2	2	2	2
3	1	1	2	2	5	1	1	2	1	1	2	2	2	2
3	1	1	2	2	6	2	1	2	1	1	2	2	2	2
3	1	2	2	2	7	2	2	2	2	1	2	2	2	2
3	1	2	2	2	7	2	2	2	2	2	2	2	2	2
3	1	2	2	2	7	2	2	2	2	2	2	2	2	1
3	1	2	2	2	7	2	2	2	2	2	2	2	2	1
3	1	2	2	2	7	2	2	2	2	2	2	2	2	1
3	1	2	3	2	7	2	2	2	2	2	2	2	2	1
3	1	2	4	2	7	2	2	2	2	2	2	2	2	1
3	1	1	2	1	4	1	1	2	2	2	2	2	2	2
3	1	2	2	1	2	2	1	2	2	2	2	2	2	1
2	1	2	3	2	4	2	1	2	2	2	2	2	2	2
3	2	3	2	2	7	2	1	2	2	2	2	2	2	1
3	2	3	2	2	7	2	1	2	2	2	2	2	2	1
3	2	3	2	2	7	2	1	2	2	2	2	2	2	1
1	1	1	1	1	3	2	2	1	2	2	2	2	2	2
1	1	1	1	1	3	2	2	1	2	2	2	2	2	2
1	1	1	1	1	3	2	2	1	2	2	2	2	2	2
1	1	1	2	2	3	2	2	1	2	2	2	2	2	2
1	1	1	2	2	3	2	2	1	2	2	2	2	2	2
1	1	1	3	2	3	2	2	1	2	2	2	2	2	2
1	1	1	3	2	3	2	2	1	2	2	2	2	2	2
1	1	1	3	2	3	2	2	1	2	2	2	2	2	2
1	1	1	3	2	3	2	2	1	2	2	2	2	2	2
1	1	1	3	2	3	2	2	1	2	2	2	2	2	2
1	1	1	1	1	3	2	2	2	2	2	2	2	1	2
1	1	1	1	1	3	2	2	2	2	2	2	2	1	2
1	1	1	1	1	3	2	2	2	2	2	2	2	1	2
1	1	1	1	1	3	2	2	2	2	2	2	2	1	2
1	1	1	1	1	6	2	2	2	2	2	2	2	1	2
1	1	1	1	1	6	2	2	2	2	2	2	2	1	2
1	1	1	1	1	6	2	2	2	2	2	2	2	1	2
1	1	1	1	1	6	2	2	2	2	2	2	2	1	2
1	1	1	1	1	3	2	2	1	2	2	2	2	2	2
1	1	1	2	1	3	2	2	1	2	2	2	2	2	2
1	1	1	2	2	3	2	2	1	2	2	2	2	2	2
1	1	1	3	2	3	2	2	1	2	2	2	2	2	2
2	1	1	1	2	1	2	1	2	2	2	2	2	2	2
2	1	2	1	1	7	2	1	2	2	2	2	2	2	2
2	1	2	1	1	7	2	1	2	2	2	2	2	2	2
2	1	1	3	2	4	2	1	2	2	2	2	2	2	2
2	1	1	3	2	1	2	1	2	2	2	2	2	2	2
2	1	1	3	2	4	2	1	2	2	2	2	2	2	2
2	1	1	3	2	4	2	1	2	2	2	2	2	2	2
2	1	1	3	2	1	2	1	2	2	2	2	2	2	2
2	1	1	3	2	4	2	1	2	2	2	2	2	2	2
2	1	1	1	2	4	2	1	2	2	2	2	2	2	2
2	1	1	1	2	4	2	1	2	2	2	2	2	2	2
2	1	1	1	2	1	2	1	2	2	2	2	2	2	2
2	1	1	1	2	1	2	1	2	2	2	2	2	2	2
2	1	1	1	2	1	2	1	2	2	2	2	2	2	2
2	1	1	3	2	1	2	1	2	2	2	2	2	2	2
2	1	1	3	2	4	2	1	2	2	2	2	2	2	2
2	1	1	1	1	4	1	1	2	2	2	2	2	2	2
2	1	1	3	2	1	2	1	2	2	2	2	2	2	2
2	1	1	1	1	1	2	1	2	2	2	2	2	2	2
2	1	1	1	2	6	2	1	2	2	2	2	2	2	2
2	1	1	1	2	4	1	1	2	2	2	2	2	2	2
2	1	1	1	2	6	2	1	2	2	2	2	2	2	2
2	1	1	1	2	6	2	1	2	2	2	2	2	2	2
2	1	1	1	2	1	2	1	2	2	2	2	2	2	2
2	1	1	1	2	5	1	2	2	2	2	2	2	2	2
2	1	1	2	1	1	1	2	2	2	2	2	2	2	2
2	1	1	1	2	1	2	1	2	2	2	2	2	2	2
2	1	1	1	2	1	1	1	2	2	2	2	2	2	2
2	1	1	1	2	4	1	1	2	2	2	2	2	2	2
2	1	1	1	2	6	2	1	2	2	2	2	2	2	2
2	1	1	1	2	6	2	1	2	2	2	2	2	2	2
2	1	1	1	2	6	2	1	2	2	2	2	2	2	2
2	1	1	1	2	1	2	1	2	2	2	2	2	2	2
2	1	1	1	1	4	2	1	2	2	2	2	2	2	2
2	1	1	1	2	6	2	1	2	2	2	2	2	2	2
2	1	1	1	2	1	1	1	2	2	2	2	2	2	2
2	1	1	3	2	1	2	1	2	2	2	2	2	2	2
2	1	1	1	1	1	2	1	2	2	2	2	2	2	2
2	1	2	2	2	7	2	2	2	2	2	1	2	2	2
2	1	2	1	2	7	2	1	2	2	2	2	2	2	2
2	1	2	3	2	7	2	1	2	2	2	2	2	2	2
2	1	2	2	2	7	2	2	2	2	2	1	2	2	2
2	1	2	3	2	7	2	2	2	2	2	1	2	2	2
2	1	2	1	2	7	2	2	2	2	2	1	2	2	2
2	1	2	2	1	7	2	1	2	2	2	2	2	2	2
2	1	2	1	1	7	2	1	2	2	2	2	2	2	2
2	1	2	1	2	7	2	1	2	2	2	2	2	2	2
2	1	2	1	2	7	2	1	2	2	2	2	2	2	2
2	1	2	2	2	7	2	2	2	2	2	1	2	2	2
2	1	2	2	2	7	2	1	2	2	2	2	2	2	2
2	1	2	3	2	7	2	1	2	2	2	2	2	2	2
2	1	2	3	2	7	2	1	2	2	2	2	2	2	2
2	1	2	2	1	7	2	1	2	2	2	1	2	2	2
3	1	1	2	1	3	1	1	2	2	2	2	2	2	2
3	1	1	2	1	3	1	1	2	2	2	2	2	2	2
3	1	1	2	1	3	1	1	2	2	2	2	2	2	2
3	1	1	2	1	3	1	1	2	2	2	2	2	2	2
3	1	1	2	1	3	1	1	2	2	2	2	2	2	2
3	1	1	2	1	3	1	1	2	2	2	2	2	2	2
3	1	1	2	1	4	1	1	2	2	2	2	2	2	2
1	1	1	1	2	3	2	2	1	2	2	2	2	2	2
1	1	1	1	2	3	2	2	1	2	2	2	2	1	2
1	1	1	1	2	3	2	2	1	2	2	2	2	1	2
1	1	1	1	1	3	2	2	1	2	2	2	2	1	2
2	1	1	2	2	4	1	1	2	2	2	2	2	2	2
2	1	1	2	2	4	1	1	2	2	2	2	2	2	2
2	1	1	2	2	4	1	1	2	2	2	2	2	2	2
2	1	1	2	2	4	1	1	2	2	2	2	2	2	2
2	1	1	2	2	4	1	1	2	2	2	2	2	2	2
2	1	1	2	2	4	1	1	2	2	2	2	2	2	2
2	1	1	2	2	4	1	1	2	2	2	2	2	2	2
2	1	1	2	2	4	1	1	2	2	2	2	2	2	2
2	1	1	2	2	4	1	1	2	2	2	2	2	2	2
3	1	1	1	2	4	1	1	2	2	2	2	2	2	2
3	1	1	2	2	4	1	1	2	2	2	2	2	2	2
3	1	1	2	2	4	1	1	2	2	2	2	2	2	2
3	1	1	2	2	4	1	1	2	2	2	2	2	2	2
3	1	1	2	2	4	1	1	2	2	2	2	2	2	2
3	1	1	2	2	4	1	1	2	2	2	2	2	2	2
3	1	1	2	2	4	1	1	2	2	2	2	2	2	2
3	1	1	2	2	4	1	1	2	2	2	2	2	2	2
3	1	1	2	2	4	1	1	2	2	2	2	2	2	2
3	1	1	2	2	4	1	1	2	2	2	2	2	2	2
3	1	1	2	2	4	1	1	2	2	2	2	2	2	2
3	1	1	2	2	4	1	1	2	2	2	2	2	2	2
3	1	1	2	1	4	1	1	2	2	2	2	2	2	2
3	1	1	2	1	4	1	1	2	2	2	2	2	2	2
3	1	1	2	1	4	1	1	2	2	2	2	2	2	2
3	1	2	2	1	4	2	2	2	1	1	2	2	2	2
3	1	2	2	1	4	2	2	2	1	1	2	2	2	2
3	1	2	2	2	4	2	2	2	1	1	2	2	2	2
3	1	2	2	2	4	2	2	2	1	1	2	2	2	2
3	1	2	2	1	4	2	2	2	1	1	2	2	2	2
3	1	2	2	1	4	2	2	2	1	1	2	2	2	2
3	1	2	2	1	4	2	2	2	1	1	2	2	2	2
3	1	2	2	2	4	2	2	2	1	1	2	2	2	2
3	2	3	2	2	7	2	1	2	2	2	2	2	2	1
3	1	1	2	1	4	1	1	2	2	2	2	2	2	2
3	1	1	2	2	4	1	1	2	2	2	2	2	2	2
3	1	1	2	1	4	1	2	2	2	2	2	2	2	2
3	1	1	2	1	4	1	1	2	2	2	2	2	2	2
3	1	1	2	2	4	1	1	2	2	2	2	2	2	2
3	1	1	2	2	4	1	1	2	2	2	2	2	2	2
3	1	1	2	2	4	1	1	2	2	2	2	2	2	2
3	1	1	2	2	4	1	1	2	2	2	2	2	2	2
3	1	1	2	2	4	1	1	2	2	2	2	2	2	2
3	1	1	1	2	4	1	1	2	2	2	2	2	2	2
3	1	1	1	1	4	2	1	2	2	2	2	2	2	2
3	1	1	2	1	4	2	1	2	2	2	2	2	2	2
3	1	1	2	2	4	1	1	2	2	2	2	2	2	2
3	1	1	1	2	4	2	1	2	2	2	2	2	2	2
3	1	2	2	1	7	2	2	2	1	1	2	2	2	2
3	1	2	2	1	7	2	2	2	1	2	2	2	2	2
3	1	2	2	1	7	2	2	2	2	1	2	2	2	2
3	1	2	2	1	7	2	2	2	1	1	2	2	2	2
3	1	2	2	2	7	2	2	2	2	1	2	2	2	2
3	1	2	2	2	7	2	2	2	1	2	2	2	2	2
3	1	2	2	2	7	2	2	2	1	1	2	2	2	2
3	1	2	2	2	7	2	2	2	1	1	2	2	2	2
3	1	2	2	1	7	2	2	2	1	2	2	2	2	2
3	1	2	2	1	7	2	2	2	1	1	2	2	2	2
3	1	2	2	1	7	2	1	2	2	2	2	2	2	1
3	1	2	2	1	7	2	1	2	2	2	2	2	2	2
3	1	2	1	1	7	2	2	2	2	1	2	2	2	2
3	1	2	2	1	7	2	2	2	2	1	2	2	2	2
3	1	2	2	1	7	2	2	2	2	2	2	1	2	2
3	1	2	2	1	7	2	2	2	2	1	2	2	2	2
3	1	2	2	1	7	2	2	2	1	2	2	2	2	2
3	1	2	2	1	7	2	1	2	2	2	2	2	2	1
3	1	2	2	1	7	2	1	2	2	2	2	2	2	1
3	1	2	4	2	7	2	2	2	2	1	2	2	2	2
3	1	2	4	2	7	2	2	2	2	1	2	2	2	2
2	1	1	1	1	4	2	1	2	2	2	2	2	2	2
2	1	1	1	1	4	2	1	2	2	2	2	2	2	2
1	1	1	1	1	3	2	2	1	2	2	2	2	2	2
1	1	1	1	1	3	2	2	1	2	2	2	2	2	2
1	1	1	1	1	3	2	2	1	2	2	2	2	2	2
1	1	1	1	1	3	2	2	1	2	2	2	2	2	2
2	2	4	2	1	7	1	2	2	2	2	1	2	2	2
2	2	4	2	1	1	2	1	2	2	2	2	2	2	2
3	2	3	2	2	7	2	2	2	1	1	2	2	2	2
3	2	3	2	2	7	2	2	2	1	1	2	2	2	2
3	2	3	2	2	7	2	1	2	2	2	2	2	2	1
2	1	1	1	1	1	1	2	2	2	2	2	2	2	2
2	1	1	1	1	1	1	2	2	2	2	2	2	2	2
2	1	1	1	1	1	1	2	2	2	2	2	2	2	2
2	1	1	1	1	1	1	2	2	2	2	2	2	2	2
2	1	1	1	1	1	1	2	2	2	2	2	2	2	2
2	1	1	1	1	1	1	2	2	2	2	2	2	2	2
2	1	1	1	1	1	1	2	2	2	2	2	2	2	2
2	1	1	1	1	1	1	2	2	2	2	2	2	2	2
2	1	1	1	1	1	1	2	2	2	2	2	2	2	2
2	1	1	2	1	1	1	2	2	2	2	2	2	2	2
2	1	2	2	1	7	2	1	2	2	2	2	2	2	2
2	1	2	2	1	7	2	1	2	2	2	2	2	2	2
2	1	2	2	1	7	1	2	2	2	2	2	2	2	2
2	1	2	2	1	7	1	2	2	2	2	2	2	2	2
2	1	2	4	1	7	2	2	2	1	2	2	2	2	2
3	1	2	2	1	7	2	2	2	2	2	2	1	2	2
3	1	2	2	1	7	2	2	2	2	2	2	1	2	2
3	1	2	2	1	7	2	2	2	1	1	1	2	2	2
3	1	2	2	1	7	2	2	2	1	1	1	2	2	2
3	1	2	2	1	7	2	2	2	1	1	1	2	2	2
3	1	2	2	1	7	2	2	2	1	1	1	2	2	2
3	1	2	2	1	7	2	2	2	1	1	1	2	2	2
3	1	2	2	1	7	2	2	2	1	1	1	2	2	2
3	1	2	2	1	7	2	2	2	1	1	1	2	2	2
3	1	2	2	2	7	2	2	2	1	1	1	2	2	2
3	1	2	2	2	7	2	2	2	1	1	1	2	2	2
3	1	1	1	1	4	2	1	2	2	2	2	2	2	2
3	1	1	2	1	4	2	1	2	2	2	2	2	2	2
3	1	1	2	1	4	2	1	2	2	2	2	2	2	2
3	1	1	2	1	4	2	1	2	2	2	2	2	2	2
3	1	1	2	1	4	2	1	2	2	2	2	2	2	2
3	1	1	2	2	4	2	1	2	2	2	2	2	2	2
3	1	1	2	2	4	2	1	2	2	2	2	2	2	2
3	1	1	2	2	4	2	2	2	2	2	2	2	2	2
1	1	1	1	1	4	2	2	1	2	2	2	2	2	2
